# Supplementary material for: Poly(vinyl alcohol) electrospun nanofibrous membrane modified with spirolactam–rhodamine derivatives for visible detection and removal of metal ions
Source: Royal Society of Chemistry journal article supplement (doi:10.1039/c4ra07505f), 2014-01-01
Supplement: c4ra07505f1.pdf [file c4ra07505f1.pdf]

## Supplementary materials for

# Poly(vinyl alcohol) electrospun nanofibrous membrane modified with spiro lactam-rhodamine derivatives for visible detection and removal of metal ions

Zhen Wei,<sup>abc</sup> • Hui Zhao,<sup>ac</sup> • Jianhua Zhang,<sup>a</sup> • Liandong Deng,<sup>a</sup> • Siyu

Wu,<sup>b</sup> • Junyu He<sup>b</sup> • and Anjie Dong<sup>ac\*</sup>

<sup>a</sup> Department of Polymer Science and Technology and Key Laboratory of Systems Bioengineering of the Ministry of Education, School of Chemical Engineering and Technology, Tianjin University, Tianjin 300072, China Fax/Tel: +86 022 27890706; E-mail: [ajdong@tju.edu.cn](mailto:ajdong@tju.edu.cn) (A. J. Dong).

<sup>b</sup> Department of Applied Chemistry, College of Basic Science, Tianjin Agricultural University, Tianjin 300384, P.R. China.

<sup>c</sup> Collaborative Innovation Center of Chemical Science and Engineering (Tianjin), Tianjin 300072, China

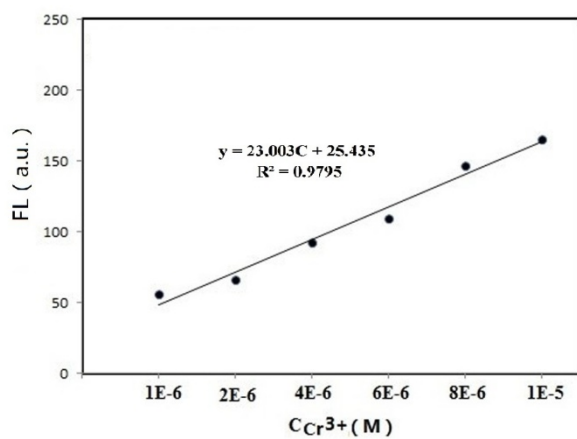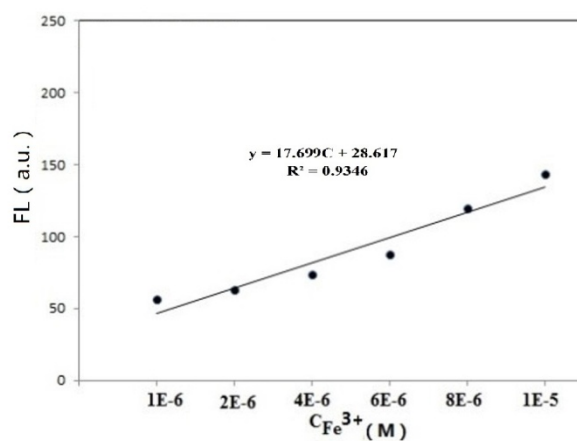

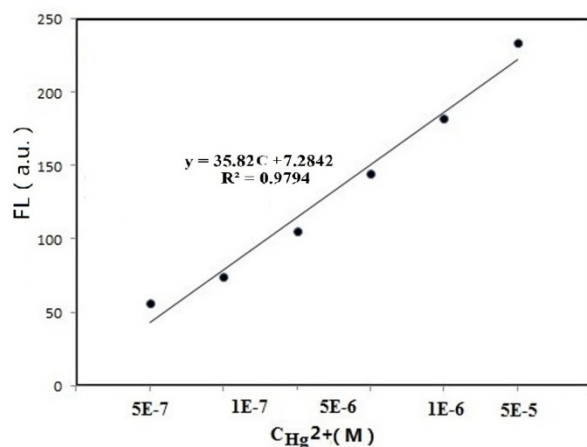

Fig. S1. Linear calibration plot for  $Cr^{3+}$ ,  $Fe^{3+}$  and  $Hg^{2+}$  in low concentration of fluorescence spectra.

The limit of detection (LOD) for  $Cr^{3+}$ ,  $Fe^{3+}$ ,  $Hg^{2+}$  was calculate by the equation  $LOD = 3S_0/S$ , where 3 was the factor at the 97% , 93%, 97% confidence level respectively,  $S_0$  was the (n = 10), and S was the slope of the calibration curve. The detection limit was determined approximately  $1.0 \times 10^{-6}$  M,  $1.0 \times 10^{-6}$  M and  $5 \times 10^{-7}$ M for  $Cr^{3+}$ ,  $Fe^{3+}$  and  $Hg^{2+}$  of fluorescence spectra, respectively.
